# Supplementary material for: Adipocytes Sequester and Metabolize the Chemotherapeutic Daunorubicin
Source: Oxford University Press journal article supplement (doi:10.1158/1541-7786.mcr-17-0338), 2017-11-08
Supplement: 15417786mcr170338-sup-185566_2_supp_4220355_tttfnc.docx [file 15417786mcr170338-sup-185566_2_supp_4220355_tttfnc.docx]

**Supplementary Table**

| **Gene** | **Forward** | **Reverse** |
| --- | --- | --- |
| AKR1A1 | 5’-GTCGGCAGATTGATGACATACTC-3’ | 5’-TGGCATTCCACCTGCAAGA-3’ |
| AKR1B1 | 5’-TATTCACTGGCCGACTGGCTTTA-3’ | 5’-GAACCACATTGCCCGACTCA-3’ |
| AKR1C1 | 5’-ATGGTCACTTCATGCCTGTC-3’ | 5’-AAGCCAGCRTCAATTGCC-3’ |
| AKR1C2 | 5’-GGGAGGCCATGGAGAAGTG-3’ | 5’-GTTGGACACCCCGATGGA-3’ |
| AKR1C3 | 5’-AGCCAGGTGAGGAACTTTCA-3’ | 5’-GGTTGAAGTTTGACACCCCA-3’ |
| AKR7A2 | 5’-GAGGACAAGGACGGGAAACAGC-3’ | 5’-CCTGTAGGTCTCAGCCCAGCTA-3’ |
| CBR1 | 5’-GAAGATTGGCGTCACCGTTC-3’ | 5’-GTCCCCTTTCCTCTGCTCACT-3’ |
| CBR3 | 5’-GGAAGGCTGGCCCAACTCAC-3’ | 5’GCTTTCCTCTTCTCATCCAGACG-3’ |
| β-actin | 5’-ACAGAGCCTCGCCTTTGCCG-3’ | 5’-CGATGCCGTGCTCGATGGGG-3’ |
